# Supplementary material
Source: PubMed Central journal article supplement (PMC7169712)
Supplement: TBED-64-1364-s001.pdf [file TBED-64-1364-s001.pdf]

**Figure S1** Nucleotide sequence alignment of the 5' UTRs of the KNU16 isolates with reference PDCoV strains. A 7-nt insertion (dashed box) and the conserved ACACCA transcription regulatory sequence (TRS) involved in genome transcription and replication (solid box) are indicated

```

HKU15-155 ACATCAATCTATGTCTC---ACCCACCCAACCTCCACTCAAATATCTCTTTGGTTCCAGAGAGTCGTAGTGTATAGCCAGAGAGCCAGTCAGAGGGCGCT 100
HKU15-44  ....T.....GT TAA..... 100
HB        ....T.....GT TAA..... 100
AH2004    .....T---..... 100
NH        .....C.....GT TAA.....T.....A..... 100
IL2768    .....GT TAA..... 100
IN2847    .....GT TAA..... 100
KY4813    .....GT TAA.....A..... 100
KNU14-04  .....T.....GT TAA..... 100
KNU16-07  .....GT TAA..... 100
KNU16-11  .....GT TAA.....A.....C..... 100
**** *  ***** * ***** 100

```

```

HKU15-155 ATCATGCAAAC TAGGGCTGGCTACTCTAGCACAGAATCACATCCCGATAATCAACAGTGCTAGAAGGTTGATTATACCATTTAATATGCCAGGCCACGC 200
HKU15-44  ..... 200
HB        ..... 200
AH2004    ..... 200
NH        ..... 200
IL2768    ..... 200
IN2847    ..... 200
KY4813    ..... 200
KNU14-04  ..... 200
KNU16-07  ..... 200
KNU16-11  ..... 200

```

```

HKU15-155 GGAGTACGATCGAGGGTACAGCATAATCTCAACTTTTGTGGGCCACAATTTAATCCTAATTGGAGAAGGCCAAAGGACTGTACTACTTTTGTAGGTGT 300
HKU15-44  ..... 300
HB        ..... 300
AH2004    .....C.....GT TAA..... 300
NH        ..... 300
IL2768    .....G..... 300
IN2847    .....G..... 300
KY4813    .....G..... 300
KNU14-04  .....G..... 300
KNU16-07  .....G..... 300
KNU16-11  .T.....G..... 300
* * ***** 300

```

```

HKU15-155 AGCAGTCGCCAGTGGGAAAGCCCAACTAGGTTACAATTGTGGTGGGGACAAATTAGGGGAAATTAATTTGGCTTATAGGGGGATGGAGC 392
HKU15-44  ..... 392
HB        ..... 392
AH2004    ..... 392
NH        ..... 392
IL2768    ..... 392
IN2847    ..... 392
KY4813    ..... 392
KNU14-04  ..... 392
KNU16-07  ..... 392
KNU16-11  ..... 392

```

**Figure S2** Nucleotide sequence alignment of the 3' UTRs of the KNU16 isolates with reference PDCoV strains. A 3-nt (TAA) insertion (solid box) at position 25,048 to 25,051 corresponding to the 3' UTR compared to the Hong Kong strain HKU15-155 is shown



|           |                                                                                                     |     |
|-----------|-----------------------------------------------------------------------------------------------------|-----|
| HKU15-155 | RQRLYVTAVEGQTHGTTSVHATDTSVVITDVCTDYIYGVSGTGIIKPSDLLLNHNGIAFTSPTGELYAFKNIITGKTLQVLPCETPSQLIVINNTVVGA | 500 |
| HKU15-44  | .....                                                                                               | 500 |
| HB        | .....                                                                                               | 500 |
| AH2004    | .....                                                                                               | 500 |
| NH        | .....                                                                                               | 500 |
| IL2768    | .....                                                                                               | 500 |
| IN2847    | .....                                                                                               | 500 |
| KY4813    | .....                                                                                               | 500 |
| KNU14-04  | .....                                                                                               | 500 |
| KNU16-07  | .....V.....                                                                                         | 500 |
| KNU16-08  | .....P.....K.....                                                                                   | 500 |
| KNU16-11  | .....P.....E.....K.....                                                                             | 500 |

\*\*\*\*\* \*\* \*\*\*\*\* \*\*

|           |                                                                                                    |     |
|-----------|----------------------------------------------------------------------------------------------------|-----|
| HKU15-155 | ITSSNSTENNRFTTTIVTPTFFYSTNATTFNCTKPVLSYGPISVCSGAIAGTSTLQNRPSIVSLYDGEVEIPSAFSLSVQTEYLQVQSEQVIVDCPQY | 600 |
| HKU15-44  | .....                                                                                              | 600 |
| HB        | .....A.....                                                                                        | 600 |
| AH2004    | .....A.....                                                                                        | 600 |
| NH        | .....A.....                                                                                        | 600 |
| IL2768    | .....V.....                                                                                        | 600 |
| IN2847    | .....T.....V.....                                                                                  | 600 |
| KY4813    | .....V.....                                                                                        | 600 |
| KNU14-04  | .....V.....                                                                                        | 600 |
| KNU16-07  | .....V.....                                                                                        | 600 |
| KNU16-08  | .....VEI.....                                                                                      | 600 |
| KNU16-11  | .....VEI.....                                                                                      | 600 |

\*\*\*\*\* \*\* \*\*\*\*\* \*\*

|           |                                                                                                     |     |
|-----------|-----------------------------------------------------------------------------------------------------|-----|
| HKU15-155 | VCNGNSRCLQLLAQYTSACSNIEAALHSSAQLDSREIINMFQTSTQSLQLANITNFKGDYNFSSILTRLGGRSAIEDLLFNKVVTSGLGTVDQDYKACS | 700 |
| HKU15-44  | .....                                                                                               | 700 |
| HB        | .....                                                                                               | 700 |
| AH2004    | .....V.....S.....                                                                                   | 700 |
| NH        | .....A.....                                                                                         | 700 |
| IL2768    | .....I.....S.....                                                                                   | 700 |
| IN2847    | .....R.....I.....S.....                                                                             | 700 |
| KY4813    | .....V.....I.....S.....                                                                             | 700 |
| KNU14-04  | .....I.....S.....                                                                                   | 700 |
| KNU16-07  | .....K.....I.....S.....                                                                             | 700 |
| KNU16-08  | .....RI.....I.....S.....                                                                            | 700 |
| KNU16-11  | .....RI.....I.....S.....                                                                            | 700 |

\*\*\*\*\* \*\* \*\*\*\*\* \*\*

|           |                                                                                                    |     |
|-----------|----------------------------------------------------------------------------------------------------|-----|
| HKU15-155 | RDMAIADLVCSQYNGIMVLPGVVDAEKMMYTGSLTGAMVFGGLTAAAAIPFATAVQARLNYVALQTNVLQENQKILAESFNQAVGNISLALSSVNDAI | 800 |
| HKU15-44  | .....                                                                                              | 800 |
| HB        | .....                                                                                              | 800 |
| AH2004    | .....                                                                                              | 800 |
| NH        | .....                                                                                              | 800 |
| IL2768    | .....                                                                                              | 800 |
| IN2847    | .....                                                                                              | 800 |
| KY4813    | .....                                                                                              | 800 |
| KNU14-04  | .....                                                                                              | 800 |
| KNU16-07  | .....                                                                                              | 800 |
| KNU16-08  | .....                                                                                              | 800 |
| KNU16-11  | .....                                                                                              | 800 |

\*\*\*\*\* \*\* \*\*\*\*\* \*\*

```

HKU15-155 QQTSEALNTVAIAIKKIQTVVNQGEALSHLTAQLSNFQAISTSIQDIYNRLEEVEANQQVDRLITGRLAALNAYVTQLLNQMSQVRSRLLAQQKINE 900
HKU15-44 .....I..... 900
HB .....I..... 900
AH2004 .....I..... 900
NH .....I..... 900
IL2768 .....I..... 900
IN2847 .....I..... 900
KY4813 .....I..... 900
KNU14-04 .....I..... 900
KNU16-07 .....I..... 900
KNU16-08 .....I..... 900
KNU16-11 .....I..... 900
*****

HKU15-155 CVKSQSSRYGFCGNGTHIFSLTQTAPNGIFFMHAVLVPNKFTRVNASAGICVDNTRGYSLQPQLILYQFNNSWRVTPRNMYPEPRLPRQADFIQLTDCSVT 1000
HKU15-44 .....P..... 1000
HB .....P..... 1000
AH2004 .....D..... 1000
NH .....I..... 1000
IL2768 .....I..... 1000
IN2847 .....I..... 1000
KY4813 .....I..... 1000
KNU14-04 .....I..... 1000
KNU16-07 .....I..... 1000
KNU16-08 .....I..... 1000
KNU16-11 .....I..... 1000
*****

HKU15-155 FYNTTAANLPNIIPDVIDVNTQTVSDIIDNLPATATPPQWDVGIYNNITILNLTVEINDLQERSKNLSQIADRLQNYIDNLTNTLVLDLEWLNRVETYLKWPWY 1100
HKU15-44 .....I..... 1100
HB .....I..... 1100
AH2004 .....I..... 1100
NH .....I..... 1100
IL2768 .....I..... 1100
IN2847 .....I..... 1100
KY4813 .....I.....E..... 1100
KNU14-04 .....I..... 1100
KNU16-07 .....I..... 1100
KNU16-08 .....I.....D..... 1100
KNU16-11 .....I.....D..... 1100
*****

HKU15-155 IWLAIALALIAFVTILITIFLCTGCCGGCGFCGGCGFLFSKKRSTDDQPTPSFKFKEW 1159
HKU15-44 .....Y..... 1160
HB .....Y..... 1159
AH2004 .....Y..... 1160
NH .....Y..... 1159
IL2768 .....Y..... 1160
IN2847 .....Y..... 1160
KY4813 .....Y..... 1160
KNU14-04 .....Y..... 1160
KNU16-07 .....Y..... 1160
KNU16-08 .....S.....-Y.....N..... 1159
KNU16-11 .....S.....-Y.....N..... 1159
*****

```

**Figure S3** Amino acid alignment of the complete S glycoprotein genes among PDCoV strains. Putative signal sequences (dotted line box) are indicated and potential *N*-glycosylation sites predicted by the software tool NetNGlyc 1.0 (<http://www.cbs.dtu.dk/services/NetNGlyc/>) are shown in boldface type. A 1-aa (asparagine, N) insertion (solid box) in the S genes of the KNU16 series and other reference strains is indicated. The dashes (-) indicate deleted sequences. A 1-aa (lysine, K) deletion (shaded box) in the S genes of KNU16-08 and KNU16-11 is indicated, and the amino acid changes identified in these two KNU16 strains are shaded

**Table S1** Results of retrospective detection of PDCoV in 10 provinces from 2014 to 2016

| Region    | 2014                  |                  | 2015           |     | 2016     |     |
|-----------|-----------------------|------------------|----------------|-----|----------|-----|
|           | <i>n</i> <sup>a</sup> | (+) <sup>b</sup> | <i>n</i>       | (+) | <i>n</i> | (+) |
| Gyeonggi  | 32                    | 1                | 18             | 7   | 36       | 7   |
| Gangwon   | 1                     | 1                | 0 <sup>c</sup> | 0   | 0        | 0   |
| Daejeon   | 45                    | 7                | 38             | 6   | 25       | 4   |
| Chungbuk  | 15                    | 7                | 19             | 4   | 12       | 5   |
| Chungnam  | 69                    | 5                | 69             | 19  | 69       | 15  |
| Gyeongbuk | 17                    | 2                | 28             | 6   | 40       | 2   |
| Gyeongnam | 18                    | 4                | 15             | 6   | 29       | 2   |
| Jeonbuk   | 20                    | 6                | 16             | 4   | 9        | 0   |
| Jeonnam   | 7                     | 1                | 5              | 1   | 4        | 0   |
| Jeju      | 5                     | 0                | 7              | 2   | 15       | 6   |
| Total     | 229                   | 34               | 215            | 55  | 239      | 41  |

<sup>a</sup> Number of diarrheal fecal/intestinal samples.

<sup>b</sup> Number of positive samples.

<sup>c</sup> No samples collected.

**Table S2** List of primers used in this study

| Primer name | Nucleotide sequence (5'–3')    | Purpose     | Location (nt) |
|-------------|--------------------------------|-------------|---------------|
| 1F-Fwd      | ACATGGGGACTAAAGATAAAAATTATAGCA | PCR         | 1–30          |
| 1F-Rev      | TTGGTTAAGCTCATATGCAGCGAGT      | RT and PCR  | 2390–2414     |
| 2F-Fwd      | GAGCTCTGGAGGCTGTTGATGTCG       | PCR         | 2200–2223     |
| 2F-Rev      | CGTACGACTCACAAACCCATTTATGG     | RT and PCR  | 4070–4094     |
| 3F-Fwd      | GTGTGGCTCCTATCTCAGGACC         | PCR         | 3541–3562     |
| 3F-Rev      | CTTATACTCGACGTGCGGAAGC         | RT and PCR  | 7142–7163     |
| 4F-Fwd      | CCAGCAGGTGTCATTCATAGAGACG      | PCR         | 6843–6867     |
| 4F-Rev      | TTCGAAGACTTTAGCTGCACACTGCTTAGT | RT and PCR  | 11615–11644   |
| 5F-Fwd      | GGTATGGTTATTGGCCACATCTCTG      | PCR         | 10956–10980   |
| 5F-Rev      | GCATCAAGGATACCGTCCTGTAAC       | RT and PCR  | 14068–14091   |
| 6F-Fwd      | GCTTGCTAGCACGAAAACACACTTG      | PCR         | 13299–13323   |
| 6F-Rev      | GGTCCAATTAATGCTTCTGCCG         | RT and PCR  | 17183–17205   |
| 7F-Fwd      | GGTATCCCTATCGTGCGCAAAC         | PCR         | 16991–17012   |
| 7F-Rev      | GTTAACGTTCTTAGTGGGGTAGCC       | RT and PCR  | 19501–19524   |
| 8F-Fwd      | GGGCGCCTTCTTGTGAGGCCAC         | PCR         | 19298–19319   |
| 8F-Rev      | GTCCAGGGATGGTAACGGCCC          | RT and PCR  | 22816–22836   |
| 9F-Fwd      | GGCTTGCCATTGCCCTGGCTC          | PCR         | 22628–22648   |
| 9F-Rev      | GCTCCATCCCCCTATAAGCC           | RT and PCR  | 25401–25422   |
| 5'RACE-R1   | GGCAGTATCACGAGCTAACTCAGCAAG    | 5'-RACE-PCR | 969–995       |
| 5'RACE-R2   | CTCCTATGGGTATCACACTTGCGCAAC    | 5'-RACE-PCR | 469–495       |
| 3'RACE-F1   | GCCCAGCTCAAGGTTTCAGAGTTG       | 3'-RACE-PCR | 24399–24422   |
| 3'RACE-F2   | CTGCTAAACCCAAACAGCAGAAGAAACC   | 3'-RACE-PCR | 24921–24948   |
| 543F        | GCCAAGAACAAGTCCAAGCGCGAC       | Sequencing  | 544–566       |
| 1094F       | GGTTGTTGGCGTAACTTTTACTGCC      | Sequencing  | 1094–1118     |
| 1649F       | CCTTAAATGCTTTGAAACCCCTGAG      | Sequencing  | 1649–1673     |
| 2753F       | GGAACGGAAGACCAGCAGCGACG        | Sequencing  | 2753–2775     |
| 4089F       | CGTACGAACGGGTTGATGCATCTAAAACAA | Sequencing  | 4089–4118     |
| 4639F       | CTCAACTTGTCGAGGACGTGGTTGC      | Sequencing  | 4639–4663     |
| 5173F       | CTGGCTGGCCTTGTAAATTACAATGC     | Sequencing  | 5173–5197     |
| 5743F       | CGCTCTCACGAGCTACCAGGCTTAG      | Sequencing  | 5743–5767     |
| 6293F       | CAATGCAGAAGACCAGTCTACCATT      | Sequencing  | 6293–6317     |
| 6941F       | GTCACTCAAGACAGCAAATCTCTTTAAC   | Sequencing  | 6941–6968     |
| 7394F       | GGGCACTGTATCTGGTATTCACATC      | Sequencing  | 7394–7418     |
| 8155F       | GGCTTAAGAATGTTGTCTATTGCCAC     | Sequencing  | 8155–8181     |
| 8743F       | GTATCGAGGATTTCAACTCATGGGC      | Sequencing  | 8743–8767     |
| 9288F       | GGTTACACTGTTGCTCTTTATATGCTG    | Sequencing  | 9288–9314     |
| 9843F       | GCTGTTGTTGTTGCTAACCTTCTTG      | Sequencing  | 9843–9867     |
| 10404F      | GATAGGGTAAAAGCTCTGTTTGAGTG     | Sequencing  | 10404–10429   |
| 11639F      | TTCGAAATCGAGGAGGAATGCTACAACGCT | Sequencing  | 11639–11668   |
| 12190F      | CCCCTTGAGTATGATGGATTCAG        | Sequencing  | 12190–12214   |
| 12741F      | CTATCACAGACTACAGCTACTACAG      | Sequencing  | 12741–12765   |
| 13873F      | CTTACCTTACCCAGATGTCTCTCG       | Sequencing  | 13873–13896   |
| 14421F      | GCATACCCATTGTAGCTAATGGTTC      | Sequencing  | 14421–14445   |
| 14993F      | GATAGCTATGCAGAGGGTTACAACAG     | Sequencing  | 14992–15017   |
| 15566F      | GCGGCGAAACCGAACTCAAGACAG       | Sequencing  | 15566–15589   |
| 16083F      | GTGAGGAGCCACTTGCTAAATTAG       | Sequencing  | 16083–16106   |
| 17542F      | CAACTGTTATTATAAGAAGTCAATG      | Sequencing  | 17542–17567   |
| 18145F      | GCAACATCAATTGCAGGAAGTGGGTG     | Sequencing  | 18145–18170   |
| 18646F      | CAACTACATAGTTAAAAAGGATAGG      | Sequencing  | 18646–18670   |



---

|        |                                |            |             |
|--------|--------------------------------|------------|-------------|
| 19858F | CTTTATTGCTTTACTAATAACACCTAC    | Sequencing | 19858–19884 |
| 20413F | GACCTGTCAGCAGTAAACAATGGCATG    | Sequencing | 20413–20439 |
| 20965F | GGTGCAATTGTGGGAACATCCAC        | Sequencing | 20965–20987 |
| 21259F | CAGTCCTTGCAGTTAGCTAATATTACCAAC | Sequencing | 21259–21288 |
| 21933F | GGCTGCACTTAATGCATATGTTACTC     | Sequencing | 21933–21958 |
| 23032F | GAAACACTCACTATGTCTGACGCAG      | Sequencing | 23032–23056 |
| 23583F | CAACGATCCAGAATTTGCTGTTCTG      | Sequencing | 23583–23607 |
| 24131F | GAAAACCATGGCTATTGGCTGCGTT      | Sequencing | 24131–24155 |

---

**Table S3** The number of nucleotide and amino acid changes between the global strains and KNU16-07 or KNU16-11.

| Encoded proteins | No. of nucleotide (amino acid) changes |                         |                   |                     |                         |                         |                         |
|------------------|----------------------------------------|-------------------------|-------------------|---------------------|-------------------------|-------------------------|-------------------------|
|                  | HKU15-155<br>/China/2012               | HKU15-44<br>/China/2012 | NH<br>/China/2016 | IN2847<br>/USA/2014 | KNU14-04<br>/Korea/2014 | KNU16-07<br>/Korea/2016 | KNU16-11<br>/Korea/2016 |
| 5' UTR           | 13/17                                  | 9/16                    | 3/10              | 1/8                 | 0/7                     | 7                       | 7                       |
| ORF1ab           | 128(27)/205(42)                        | 203(34)/278(48)         | 163(27)/236(42)   | 24(7)/103(22)       | 30(6)/97(21)            | 105(27)                 | 105(27)                 |
| S                | 56(1)/80(27)                           | 49(15)/73(22)           | 64(18)/90(27)     | 14(3)/34(16)        | 10(8)/34(17)            | 44(25)                  | 44(25)                  |
| E                | 1(0)/2(1)                              | 1(0)/2(1)               | 2(0)/3(1)         | 0(0)/1(1)           | 0(0)/1(1)               | 1(1)                    | 1(1)                    |
| M                | 6(1)/5(1)                              | 8(0)/7(0)               | 6(0)/5(0)         | 1(0)/0(0)           | 2(0)/1(0)               | 1(0)                    | 1(0)                    |
| NS6              | 2(0)/3(1)                              | 1(1)/2(2)               | 4(0)/5(1)         | 1(1)/2(2)           | 0(0)/1(1)               | 1(1)                    | 1(1)                    |
| N                | 10(1)/17(2)                            | 10(0)/17(1)             | 11(0)/18(1)       | 3(0)/10(1)          | 5(0)/12(1)              | 9(1)                    | 9(1)                    |
| NS7              | 5(4)/10(8)                             | 5(5)/10(9)              | 6(6)/11(10)       | 2(2)/7(6)           | 3(3)/8(7)               | 5(4)                    | 5(4)                    |
| 3' UTR           | 5/8                                    | 3/6                     | 3/6               | 0/3                 | 1/4                     | 3                       | 3                       |
